# Supplementary material
Source: PubMed Central journal article supplement (PMC3326261)
Supplement: NIHMS362346-supplement-01.pdf [file NIHMS362346-supplement-01.pdf]

## Supplementary information

### **Functional parsing of driver mutations in the colorectal cancer genome reveals numerous suppressors of anchorage-independent growth**

Ugur Eskiocak<sup>1</sup>, Sang Bum Kim<sup>1</sup>, Peter Ly<sup>1</sup>, Andres I. Roig<sup>1</sup>, Sebastian Biglione<sup>1</sup>,  
Kakajan Komurov<sup>2</sup>, Crystal Cornelius<sup>1</sup>, Woodring E. Wright<sup>1</sup>, Michael A. White<sup>1</sup>, and  
Jerry W. Shay<sup>1</sup>.

<sup>1</sup>*Department of Cell Biology, University of Texas Southwestern Medical Center, 5323  
Harry Hines Boulevard, Dallas, TX 75390-9039.* <sup>2</sup>*Department of Systems Biology,  
University of Texas M.D. Anderson Cancer Center, Houston, TX 77054.*

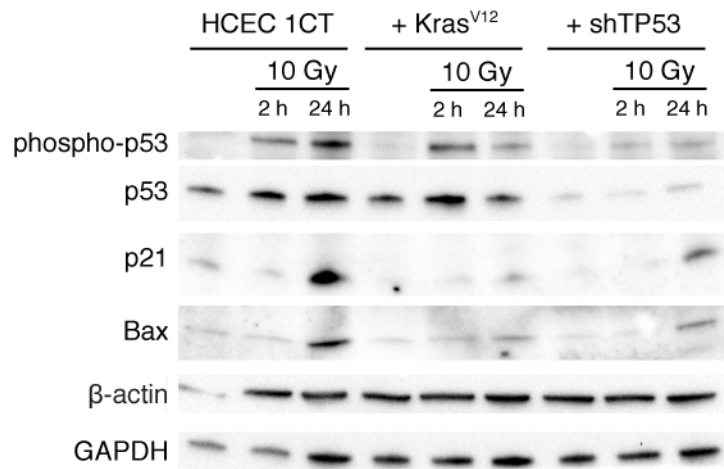

**Supplementary Figure S1.** K-ras<sup>V12</sup> expressing cells are resistant to p53 induced apoptosis. Whole-cell extracts from immortalized K-ras<sup>V12</sup> or p53 down regulated HCECs were immunoblotted with p53 and its down-stream effectors after 10 Gy gamma-radiation.

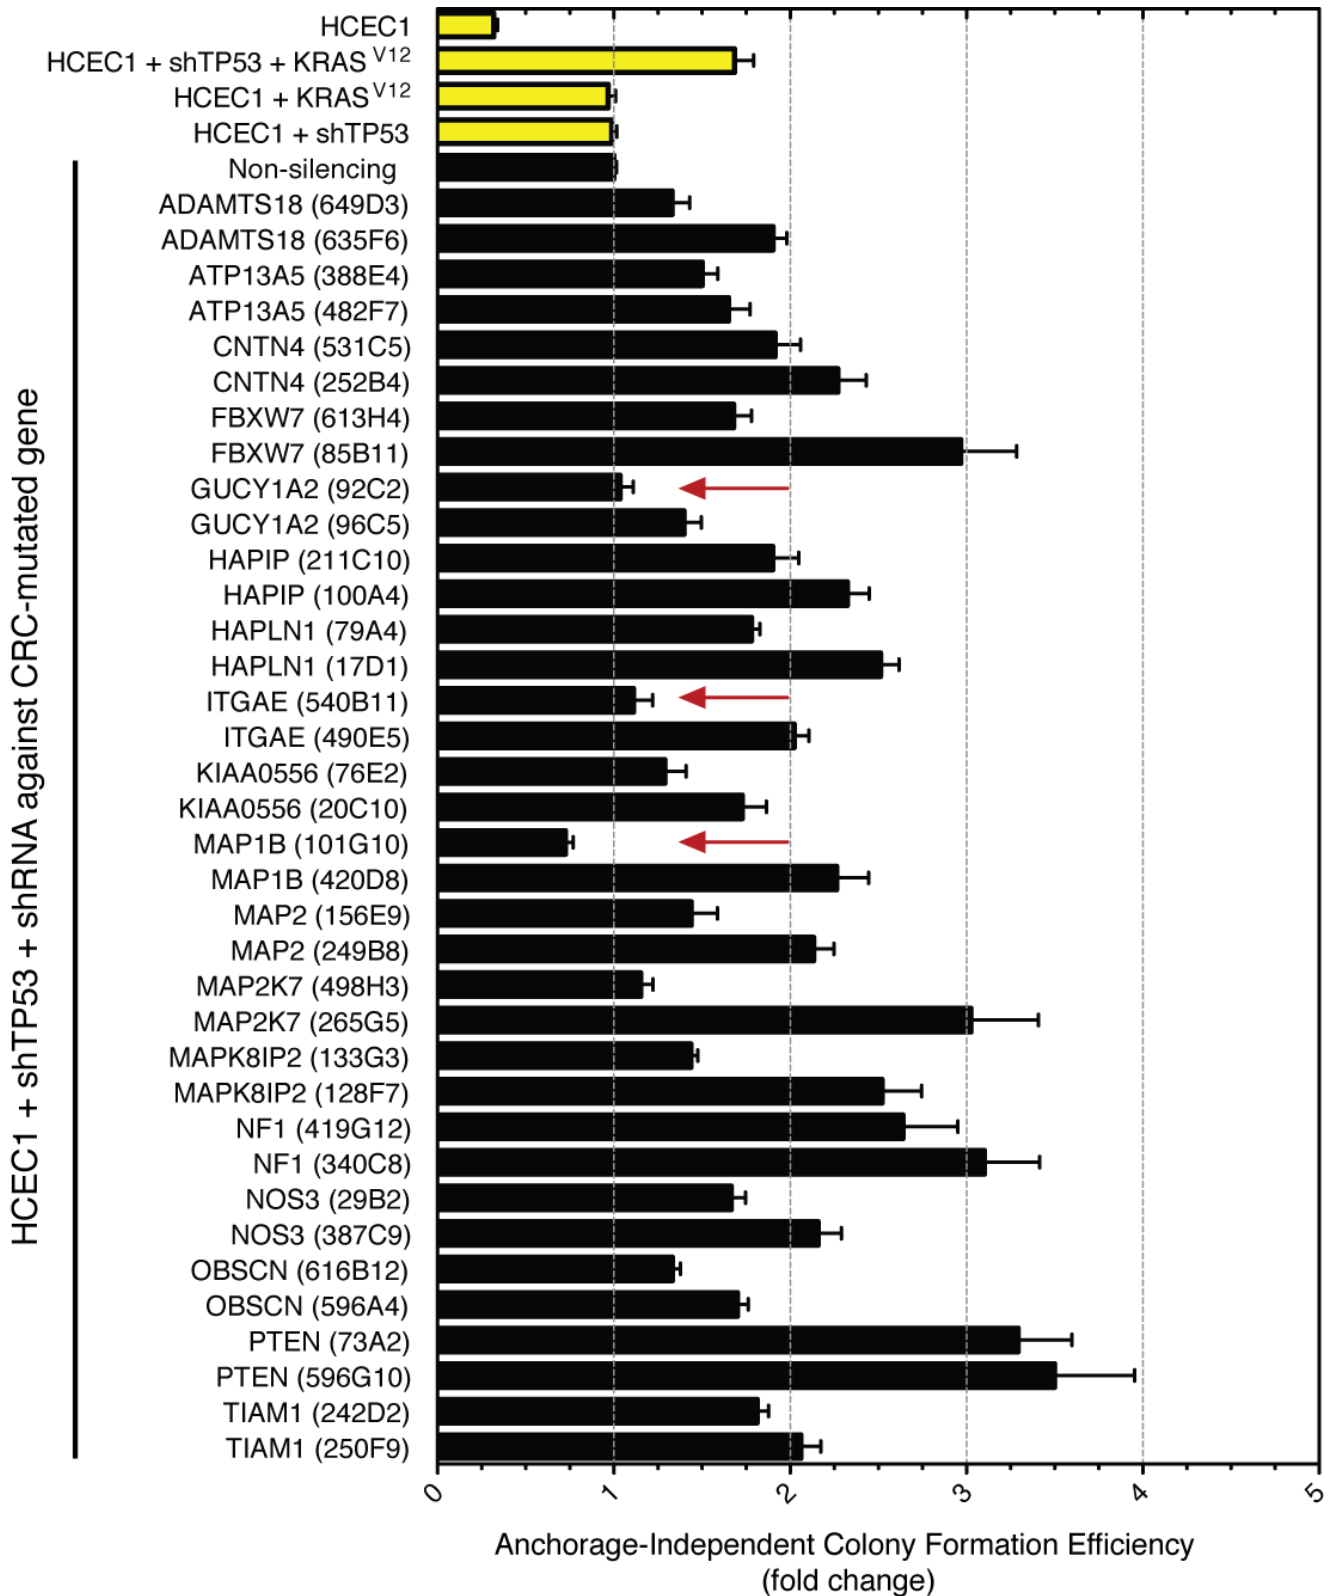

**Supplementary Figure S2.** Quantitative validation of selected shRNAs for their ability to enhance soft-agar growth of immortalized shTP53 expressing HCECs. Each bar represents 8 data points (quadruplicates from two separate experiments). Arrows denote shRNAs that failed to enhance anchorage-independent growth in a statistically significant manner. Enhancement for all other shRNAs were significant (two tailed Student's t-test, compared to none, mean  $\pm$  s.e.m.,  $P < 0.05$ ).

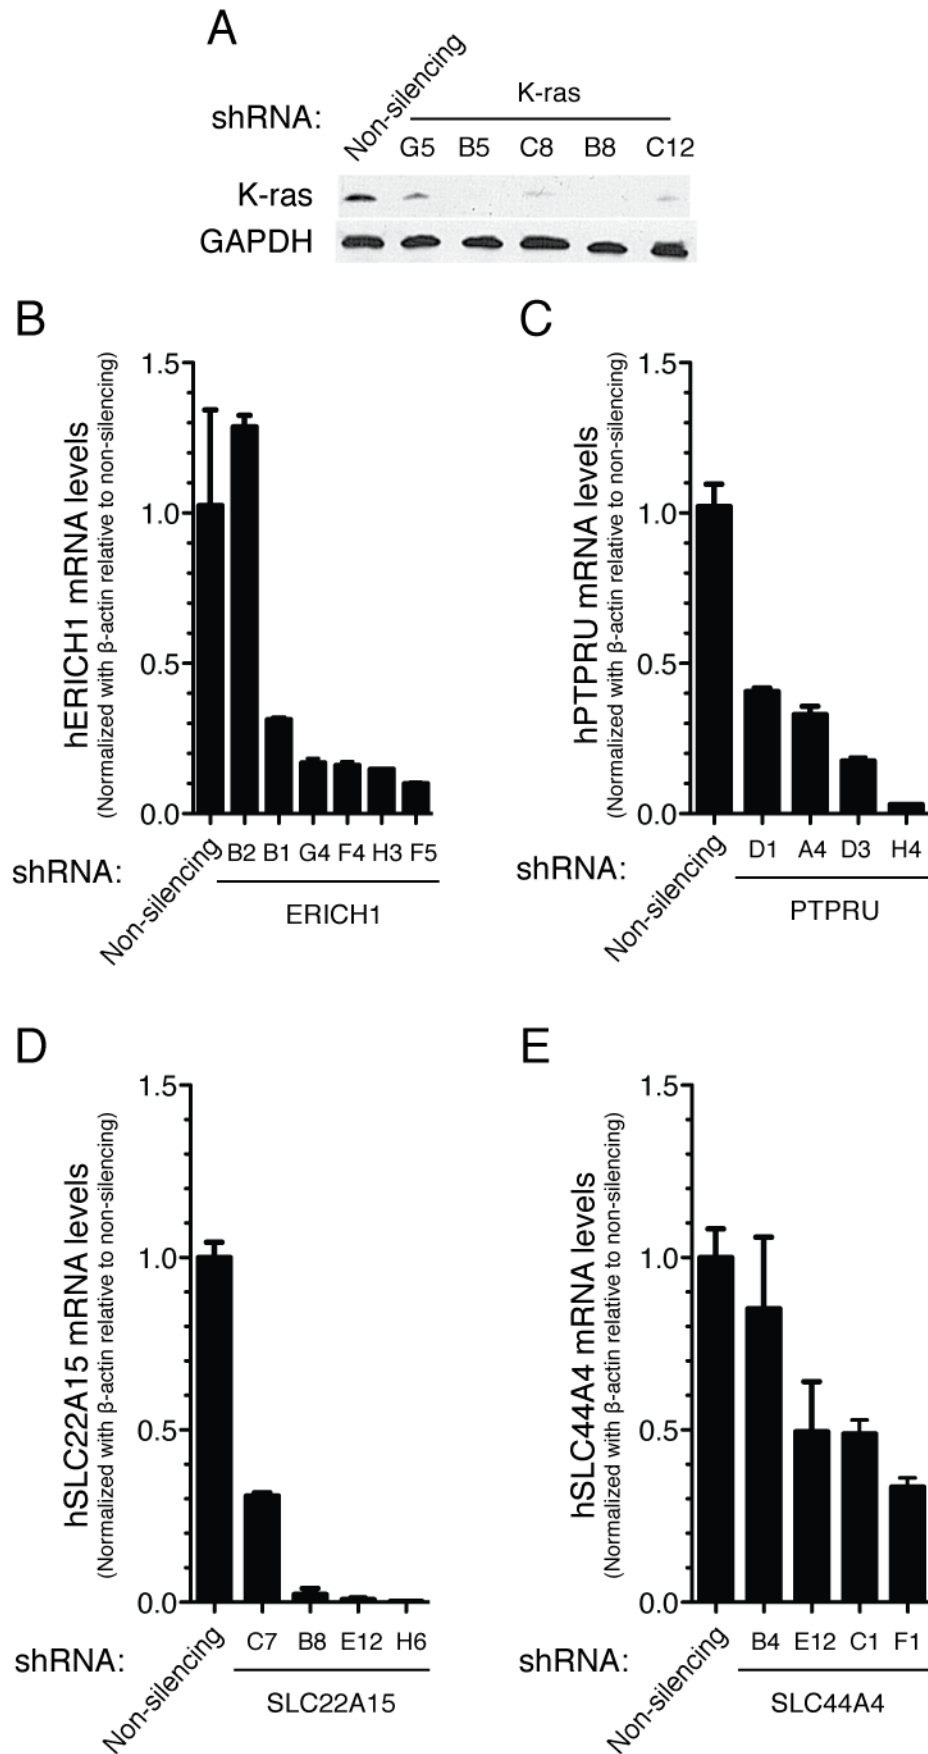

**Supplementary Figure S3.** Ability of shRNAs to knockdown expression was demonstrated by A, immunoblotting for K-ras or B-E, Quantitative RT-PCR for ERICH1, PTRU, SLC22A15 and SLC44A4 48 hours after transfection into 293FT cells. Two out of 23 tested shRNAs did not provide any knockdown.

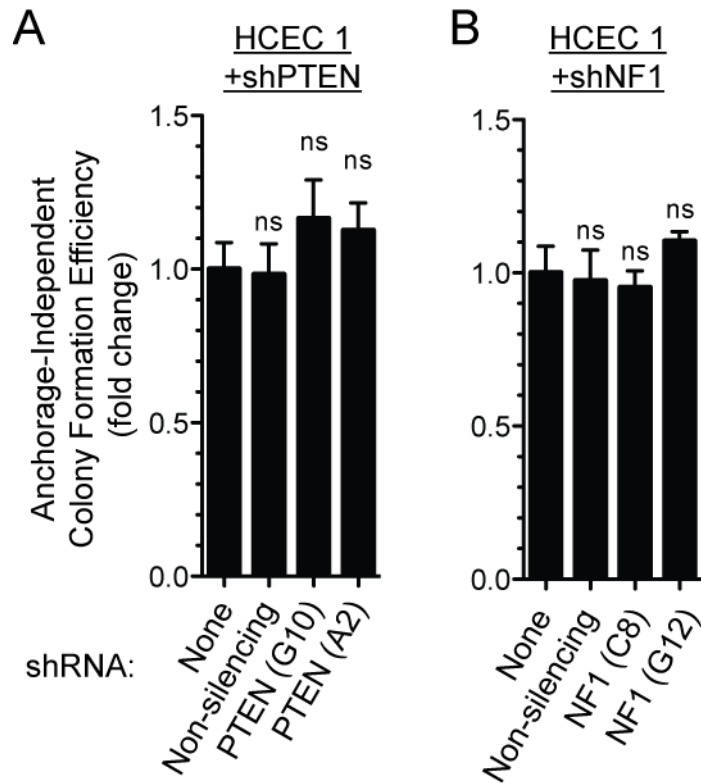

**Supplementary Figure S4.** shRNAs against A, PTEN and B, NF1 do not enhance soft agar growth in HCECs without oncogenic manipulations (Student's t-test, compared to none, mean  $\pm$  s.e.m., ns= non-significant).

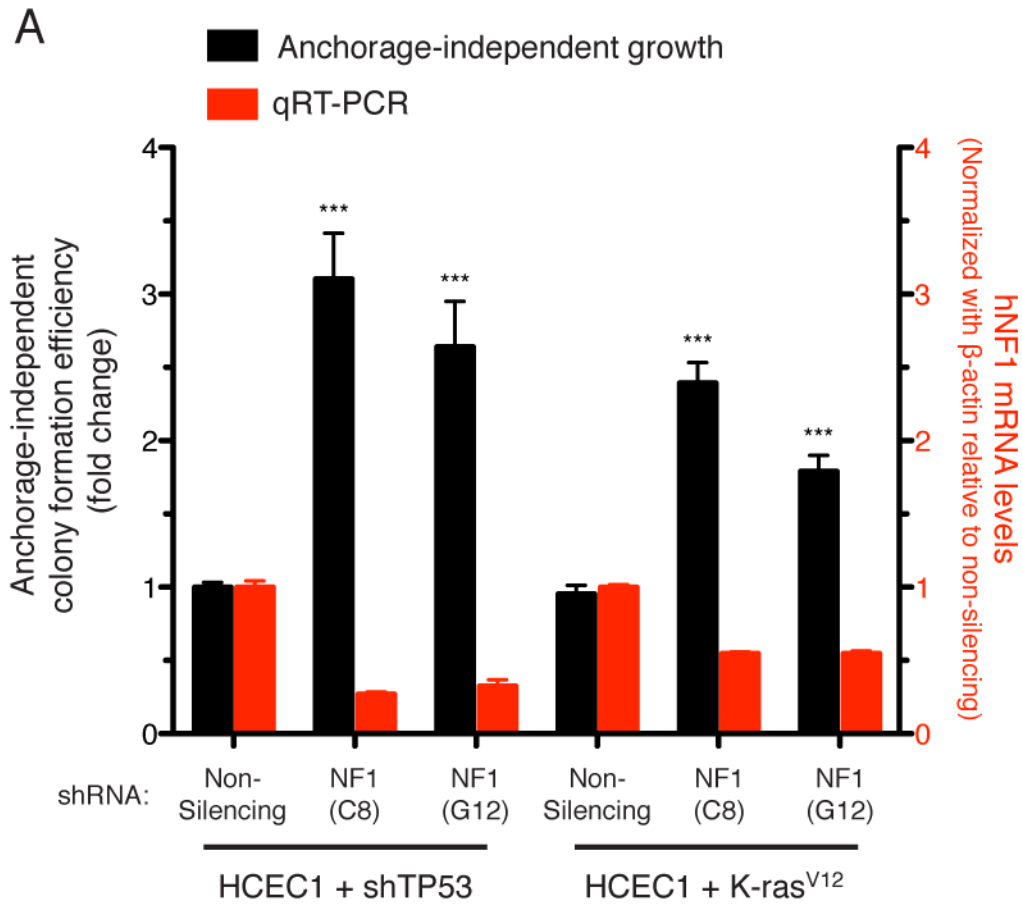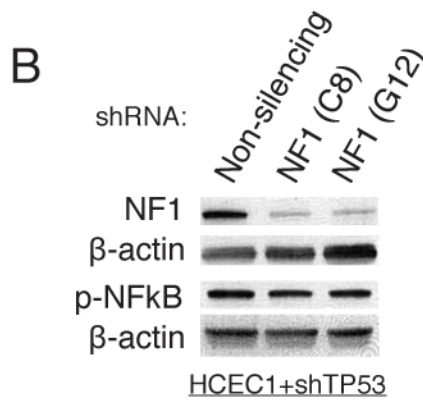

**Supplementary Figure S5.** A, shRNAs against NF1 enhance soft agar growth HCECs both in shTP53 and oncogenic K-ras background (left axis, black bars, two tailed Student's t-test, compared to non-silencing, mean  $\pm$  s.e.m., \*\*\* $P$ <0.0001) and provide knock down measured by quantitative RT-PCR analysis for human NF1 mRNA (right axis, red bars). B, Whole-cell extracts from shTP53 expressing cells were immunoblotted for the indicated antibodies.

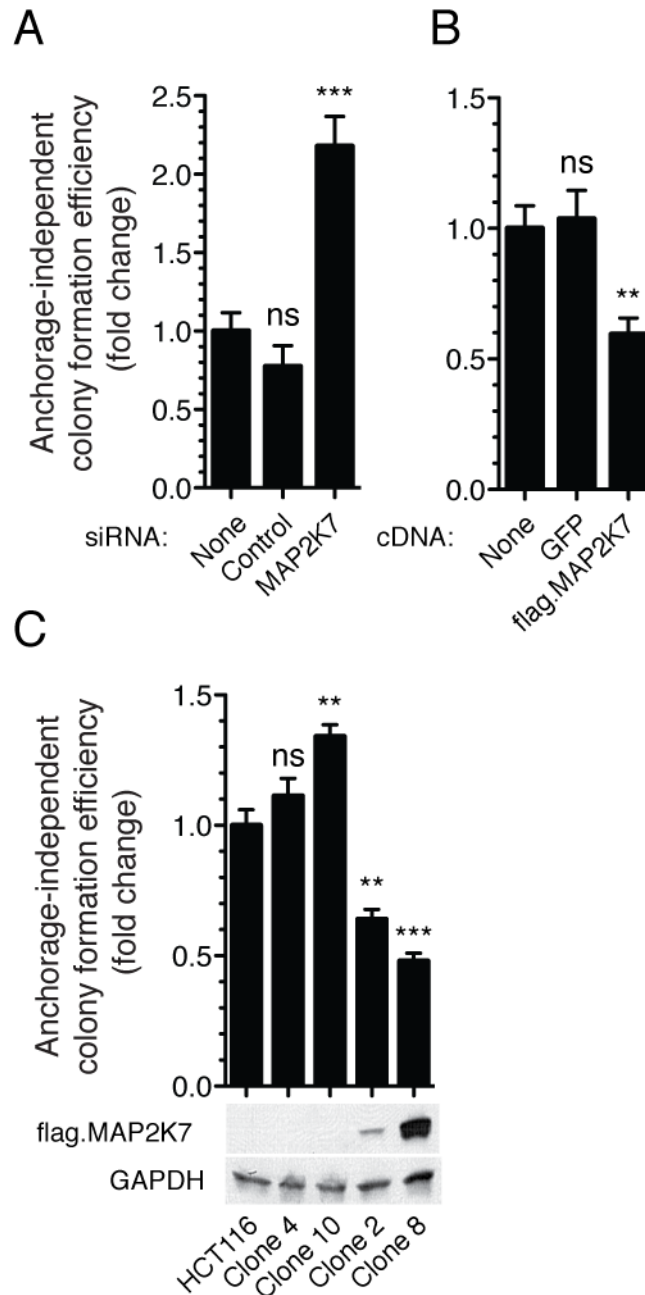

**Supplementary Figure S6.** A, HCT116 cells were transfected with control or MAP2K7 siRNAs, cultured in soft agar for two weeks and colonies larger than 0.2mm were counted. Each bar represents 8 data points (quadruplicates from two separate experiments). B, HCT116 cells were transfected with control or flag tagged MAP2K7 cDNAs, cultured in soft agar for two weeks and colonies larger than 0.2mm were counted. Each bar represents 8 data points (quadruplicates from two separate experiments). C, Cells in B selected for G418 resistance that is co-expressed from flag.MAP2K7 cDNA vector. Parental cells, two clones without detectable flag expression (as a control for cloning protocol and clonal variation) and two with varying flag expression were cultured in soft agar for a week and colonies larger than 0.2mm were counted. Each bar represents 6 data points (triplicates from two separate experiments, two tailed Student's t-test, compared to none, mean  $\pm$  s.e.m., ns= non-significant, \*\* $P$ <0.001, \*\*\* $P$ =0.0001).

**A**

HCEC 1 + shTP53

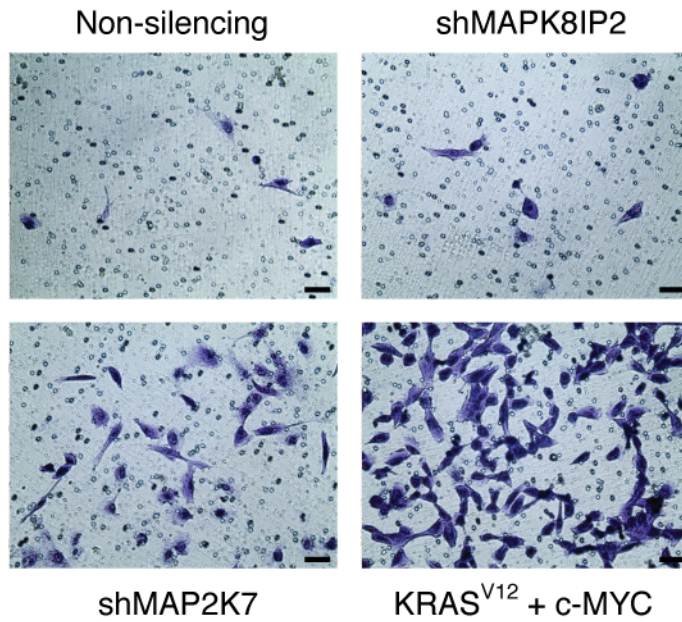**B**

HCEC 1 + shTP53

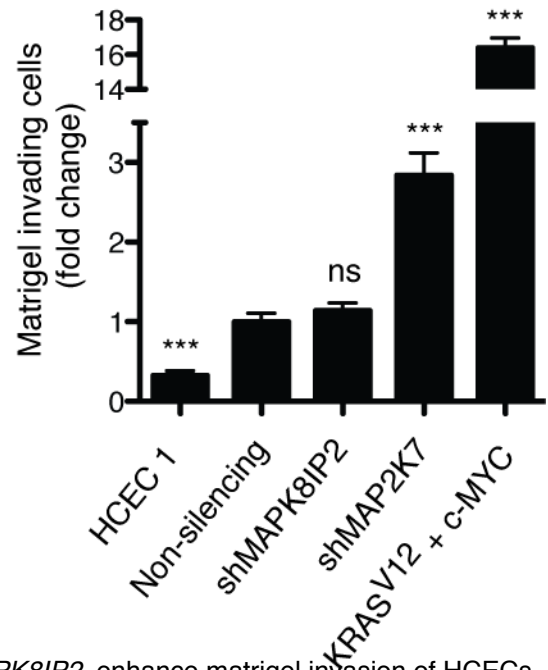

**Supplementary Figure S7.** shRNAs against *MAP2K7*, but not *MAPK8IP2*, enhance matrigel invasion of HCECs. A, Representative images (bars: 50 μm) B, quantification of A (two tailed Student's t-test, compared to non-silencing, mean ± s.e.m., \*\*\* $P < 0.0001$ ).



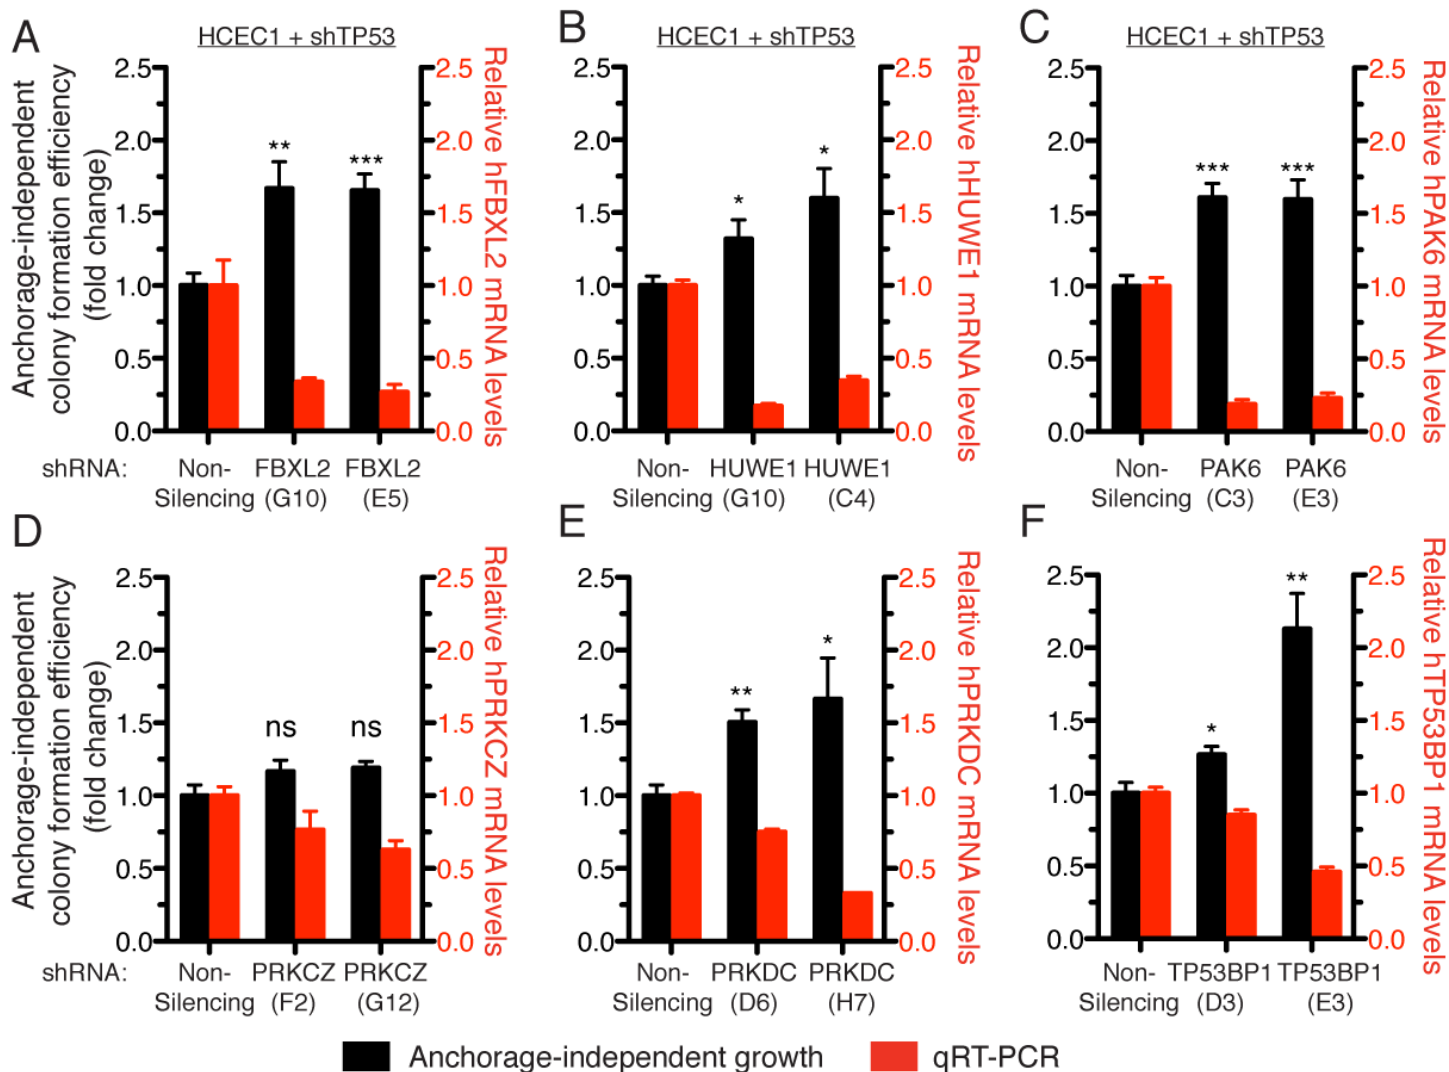

**Supplementary Figure S8.** shRNAs against A, *FBXL2*; B, *HUWE1*; C, *PAK6*; D, *PRKCZ*; E, *PRKDC* and F, *TP53BP1* were tested for their ability to enhance anchorage-independent growth in p53 down-regulated cells (left axis, black bars, two tailed Student's t-test, compared to non-silencing, mean  $\pm$  s.e.m., \* $P$ <0.05, \*\* $P$ <0.005, \*\*\* $P$ <0.0001) ) and provide knockdown measured by quantitative RT-PCR analysis for human mRNA levels (right axis, red bars).

## Supplementary Table S1. List of all screened shRNAs targeting CRC-mutated genes

| Gene Symbol | Clone ID       | 1CTR | 1CTP | Gene Symbol | Clone ID       | 1CTR | 1CTP | Gene Symbol | Clone ID       | 1CTR | 1CTP | Gene Symbol | Clone ID       | 1CTR | 1CTP | Gene Symbol | Clone ID       | 1CTR | 1CTP | Gene Symbol | Clone ID       | 1CTR | 1CTP |
|-------------|----------------|------|------|-------------|----------------|------|------|-------------|----------------|------|------|-------------|----------------|------|------|-------------|----------------|------|------|-------------|----------------|------|------|
| ABCA1       | VZLHS_64364    |      |      | CHL1        | VZLHS_80198    | +    | +    | FBXW7       | VZLHS_254965   | +    | +    | LMO7        | VZLHS_114789   |      |      | PLCG2       | VZLHS_262144   |      |      | SMAD2       | VZLHS_206703   |      |      |
| ABCA1       | VZLHS_64362    |      |      | CHL1        | VZLHS_258073   | +    | +    | FLNC        | VZLHS_238475   |      |      | LMO7        | VZLHS_114791   | +    | +    | PLCG2       | VZLHS_170087   |      |      | SMAD2       | VZLHS_285936   |      |      |
| ABCA1       | VZLHS_64365    |      |      | CHL1        | VZLHS_260545   |      |      | FLNC        | VZLHS_327303   |      |      | LMO7        | VZLHS_114786   | +    | +    | PRDM9       | VZLHS_189753   | +    | +    | SMAD2       | VZLHS_216709   |      | +    |
| ABCB11      | VZLHS_23959    |      |      | CHL1        | VZLHS_91574    |      |      | FLNC        | VZLHS_327300   |      |      | LMO7        | VZLHS_114787   |      |      | PRDM9       | VZLHS_191050   | +    | +    | SMAD3       | VZLHS_215032   | +    |      |
| ABCB11      | VZLHS_23961    |      |      | CHL1        | VZLHS_91578    | +    | +    | FN1         | VZLHS_113935   |      |      | LMO7        | VZLHS_114790   |      |      | PRKD1       | VZLHS_170466   | +    | +    | SMAD4       | VZLHS_37199    |      |      |
| ABCB11      | TRCN000059362  |      |      | CLSTN2      | VZLHS_201036   |      |      | FN1         | VZLHS_113940   |      |      | LRP2        | VZLHS_48258    | +    | +    | PRKD1       | VZLHS_170467   | +    | +    | SMAD4       | VZLHS_37198    |      |      |
| ACAN        | VZLHS_193758   |      |      | CLSTN2      | VZLHS_200976   | +    | +    | FN1         | VZLMM_433067   |      |      | LRP2        | VZLHS_48259    | +    | +    | PRKD1       | VZLHS_170464   | +    | +    | SMAD4       | VZLHS_37195    |      |      |
| ACAN        | TRCN000071732  |      |      | CLSTN2      | VZLHS_11827    |      |      | GALNS       | VZLHS_93416    | +    | +    | MAP1B       | VZLHS_209336   | +    | +    | PRKD1       | VZLHS_170465   | +    | +    | SMAD4       | VZLHS_37195    |      |      |
| ACAN        | VZLHS_193758   |      |      | CNTN4       | VZLHS_38255    | +    | +    | GALNS       | VZLHS_93414    | +    | +    | MAP1B       | VZLHS_197483   | +    | +    | PRKD1       | VZLHS_170466   | +    | +    | SMTN        | VZLHS_94901    |      |      |
| ACSL5       | VZLHS_115033   |      |      | CNTN4       | VZLHS_245484   |      |      | GALNS       | VZLHS_358773   |      |      | MAP2        | VZLHS_151558   | +    | +    | PRKD1       | VZLHS_170467   | +    | +    | SMTN        | TRCN0000123229 |      |      |
| ACSL5       | VZLHS_115032   |      |      | CNTN4       | VZLHS_38256    | +    | +    | GJ04        | VZLHS_39029    | +    | +    | MAP2        | VZLHS_151557   | +    | +    | PRKD1       | VZLHS_170464   | +    | +    | SMTN        | TRCN0000123230 |      |      |
| ADAM29      | VZLHS_252416   |      |      | COL3A1      | VZLHS_88556    |      |      | GJ04        | TRCN000074124  |      |      | MAP2        | VZLHS_151560   | +    | +    | PRKD1       | VZLHS_170465   | +    | +    | SORL1       | VZLHS_153328   |      |      |
| ADAM29      | VZLHS_397683   |      |      | COL3A1      | VZLHS_259244   | +    | +    | GLI3        | VZLHS_82985    | +    | +    | MAP2K7      | VZLHS_19417    | +    | +    | PRUNE2      | VZLHS_212836   |      |      | SORL1       | TRCN0000062948 |      |      |
| ADAM29      | VZLHS_397686   |      |      | COL3A1      | TRCN000003295  | +    | +    | GLI3        | VZLHS_82970    | +    | +    | MAP2K7      | VZLHS_262276   | +    | +    | PRUNE2      | VZLHS_204508   | +    | +    | SORL1       | TRCN0000062949 |      |      |
| ADAMT15     | VZLHS_70921    | +    | +    | COL3A1      | TRCN000003293  | +    | +    | GLI3        | VZLHS_372806   |      |      | MAP3KIP2    | VZLHS_50504    | +    | +    | PRUNE2      | VZLHS_235448   |      |      | STAB1       | VZLHS_386813   |      |      |
| ADAMT15     | VZLHS_364310   | +    | +    | COL3A1      | TRCN000003294  | +    | +    | GNAS        | VZLHS_93436    | +    | +    | MAP3KIP2    | VZLHS_50507    | +    | +    | PRUNE2      | VZLHS_207055   | +    | +    | STAB1       | VZLHS_386815   |      |      |
| ADAMT15     | VZLHS_364309   | +    | +    | COL3A1      | TRCN0000091487 | +    | +    | GNAS        | VZLHS_268469   | +    | +    | MCM3AP      | VZLHS_47913    | +    | +    | PTEN        | VZLHS_119551   | +    | +    | SYNE1       | VZLHS_79914    | +    | +    |
| ADAMT18     | VZLHS_123010   | +    | +    | CPAMD8      | VZLHS_225403   |      |      | GNAS        | VZLHS_202713   |      |      | MCM3AP      | VZLHS_47912    |      |      | PTEN        | VZLHS_285808   |      |      | SYNE1       | VZLHS_79910    |      |      |
| ADAMT18     | VZLHS_70909    |      |      | CPAMD8      | VZLHS_114636   | +    | +    | GPR112      | VZLHS_215633   |      |      | MKRN3       | VZLHS_56062    |      |      | PTEN        | VZLHS_231477   | +    | +    | SYNE1       | VZLHS_79911    | +    | +    |
| ADAMT18     | VZLHS_123009   |      |      | CSMD3       | VZLHS_166348   |      |      | GPR112      | VZLHS_211038   |      |      | MKRN3       | VZLHS_56060    |      |      | PTEN        | VZLHS_92317    | +    | +    | SYNE1       | VZLHS_334366   |      |      |
| ADAMT18     | VZLHS_70905    | +    | +    | CSMD3       | VZLHS_119271   |      |      | GPR158      | VZLHS_90354    |      |      | MKRN3       | VZLHS_56057    |      |      | PTEN        | VZLHS_92314    | +    | +    | SYT14L      | VZLHS_165008   |      |      |
| ADAMT18     | VZLHS_70907    |      |      | CSMD3       | VZLHS_119274   | +    | +    | GPR158      | TRCN0000062923 |      |      | MLL3        | VZLHS_80368    | +    | +    | PTEN        | VZLHS_92319    |      |      | SYT14L      | VZLHS_353747   |      |      |
| ADAMT18     | VZLHS_70906    | +    | +    | CUX1        | VZLHS_151077   |      |      | GPR158      | VZLHS_151077   |      |      | MLL3        | VZLHS_282577   | +    | +    | PTEN        | VZLHS_228508   | +    | +    | SYT14L      | VZLHS_353743   | +    | +    |
| ADAMT20     | VZLHS_272489   |      |      | CLX1        | VZLHS_151079   |      |      | GRD1        | VZLHS_226116   |      |      | MLL3        | VZLHS_248916   | +    | +    | PTEN        | VZLHS_162536   | +    | +    | TA2         | VZLHS_153737   | +    | +    |
| ADAMT20     | VZLHS_136558   | +    | +    | DPP10       | VZLHS_213795   | +    | +    | GRD1        | TRCN0000063034 |      |      | MMP2        | VZLHS_48434    | +    | +    | PTPRD       | VZLHS_221647   | +    | +    | TA2         | VZLHS_153736   | +    | +    |
| ADAMT20     | VZLHS_302842   | +    | +    | DPP10       | TRCN0000046663 |      |      | GRD1        | TRCN0000063033 |      |      | MMP2        | VZLHS_48430    | +    | +    | PTPRD       | VZLHS_170974   | +    | +    | TA2         | VZLHS_153738   | +    | +    |
| ADAMTSL3    | VZLHS_54992    |      |      | DPP10       | TRCN0000046664 |      |      | GRM1        | VZLHS_130872   | +    | +    | MMP2        | VZLHS_48431    | +    | +    | PTPRD       | VZLHS_211074   | +    | +    | TBX22       | VZLHS_154236   | +    | +    |
| ADAMTSL3    | VZLHS_54991    | +    | +    | DSCAML1     | VZLHS_57527    |      |      | GRM1        | VZLHS_130874   |      |      | MYO18B      | VZLHS_159519   | +    | +    | PTPRD       | VZLHS_170972   | +    | +    | TBX22       | VZLHS_154237   | +    | +    |
| ADAMTSL3    | VZLHS_54989    |      |      | DSCAML1     | VZLHS_57526    | +    | +    | GRM1        | VZLHS_130870   | +    | +    | MYO18B      | TRCN0000117367 |      |      | PTPRD       | VZLHS_170976   | +    | +    | TCERG1L     | VZLHS_41904    | +    | +    |
| ADAR2       | VZLHS_26787    |      |      | DTNB        | VZLHS_74472    | +    | +    | GUICY1A2    | VZLHS_130956   | +    | +    | MYO18B      | TRCN0000117368 |      |      | PTPRS       | VZLHS_171032   |      |      | TCERG1L     | VZLHS_41900    | +    | +    |
| ADAR2       | VZLHS_26796    | +    | +    | DTNB        | VZLHS_74470    |      |      | GUICY1A2    | VZLHS_130958   |      |      | MYO19       | VZLHS_137025   |      |      | PTPRS       | VZLHS_634063   |      |      | TCERG1L     | VZLHS_244266   | +    | +    |
| ADAR2       | VZLHS_26755    |      |      | DTNB        | VZLHS_74471    | +    | +    | GUICY1A2    | VZLHS_130955   | +    | +    | MYO19       | VZLHS_137024   | +    | +    | PTPRS       | VZLHS_634062   | +    | +    | TCF7L2      | VZLHS_116684   | +    | +    |
| AKAP12      | VZLHS_220134   |      |      | EPHA3       | VZLHS_43360    |      |      | GUICY1A2    | VZLHS_237217   |      |      | MYO19       | VZLHS_137020   | +    | +    | PTPRU       | VZLHS_197528   | +    | +    | TCF7L2      | VZLHS_116688   | +    | +    |
| AKAP12      | VZLHS_221508   | +    | +    | EPHA3       | VZLHS_639472   |      |      | HAPLN1      | VZLHS_150924   | +    | +    | MYO5C       | VZLHS_26316    |      |      | PTPRU       | VZLHS_239079   | +    | +    | TCF7L2      | VZLHS_116683   | +    | +    |
| AKAP12      | VZLHS_50557    | +    | +    | EPHA3       | VZLHS_639471   |      |      | HAPLN1      | VZLHS_150925   | +    | +    | NAV3        | VZLHS_95965    | +    | +    | PTPRU       | VZLHS_197656   | +    | +    | TGFB2       | VZLHS_153994   | +    | +    |
| AKAP12      | VZLHS_50556    | +    | +    | EPHA3       | VZLHS_639472   |      |      | HAPLN1      | VZLHS_191024   | +    | +    | NAV3        | VZLHS_95967    | +    | +    | PTPRU       | VZLHS_196429   | +    | +    | TGFB2       | VZLHS_153994   | +    | +    |
| AKAP6       | VZLHS_27894    | +    | +    | EPHB6       | VZLHS_17714    |      |      | HAPLN1      | TRCN0000150533 | +    | +    | NF1         | VZLHS_189526   | +    | +    | RASGRF2     | VZLHS_201735   | +    | +    | TGM3        | VZLHS_154012   | +    | +    |
| AKAP6       | VZLHS_27895    | +    | +    | EPHB6       | VZLHS_17717    |      |      | HIST1H1B    | VZLHS_37955    | +    | +    | NF1         | VZLHS_193129   | +    | +    | RASGRF2     | VZLHS_203362   | +    | +    | TGM3        | VZLHS_154017   | +    | +    |
| ALK         | VZLHS_70308    |      |      | EPHB6       | VZLHS_17717    |      |      | HIST1H1B    | VZLHS_37954    | +    | +    | NF1         | VZLHS_76028    | +    | +    | RASGRF2     | VZLHS_202571   | +    | +    | TGM3        | TRCN0000036129 |      |      |
| ALK         | VZLHS_15587    |      |      | ERCC6       | VZLHS_182155   |      |      | IGFBP3      | VZLHS_111629   | +    | +    | NF1         | VZLHS_76027    | +    | +    | RET         | VZLHS_203395   | +    | +    | TIAM1       | VZLHS_154064   | +    | +    |
| APC         | VZLHS_153492   |      |      | ERCC6       | VZLHS_182151   | +    | +    | IGFBP3      | VZLHS_111628   | +    | +    | NF1         | VZLHS_269806   | +    | +    | RET         | TRCN0000040024 |      |      | TIAM1       | VZLHS_154060   | +    | +    |
| APC         | VZLHS_240271   |      |      | ERCC6       | VZLHS_182153   | +    | +    | IGFBP3      | VZLHS_225594   |      |      | NF1         | VZLHS_76029    | +    | +    | RNF219      | VZLHS_136271   | +    | +    | TLR9        | VZLHS_154388   | +    | +    |
| APC         | VZLHS_153494   |      |      | ERCC6       | VZLHS_83786    |      |      | IGSF22      | VZLHS_178658   |      |      | NF1         | VZLHS_190255   | +    | +    | RNF219      | VZLHS_136273   | +    | +    | TLR9        | VZLHS_635783   | +    | +    |
| APC         | VZLHS_89656    |      |      | ERCC6       | VZLHS_100666   |      |      | IGSF22      | VZLHS_178659   | +    | +    | NF1         | VZLHS_76032    | +    | +    | RNF219      | VZLHS_136270   | +    | +    | TLR9        | VZLHS_636051   | +    | +    |
| ARHGEF10    | VZLHS_80181    |      |      | ERCC6       | VZLHS_83785    | +    | +    | IGSF22      | VZLHS_178660   | +    | +    | NOS3        | VZLHS_111653   | +    | +    | RNF219      | VZLHS_136275   | +    | +    | TNN         | VZLHS_77556    |      |      |
| ARHGEF10    | VZLHS_80180    |      |      | ERCC6       | VZLHS_182154   | +    | +    | IR54        | VZLHS_28086    | +    | +    | NOS3        | VZLHS_111652   | +    | +    | ROBO1       | VZLHS_32195    | +    | +    | TNN         | VZLHS_77554    | +    | +    |
| ATP11A      | VZLHS_249221   | +    | +    | ERCC6       | VZLHS_83784    | +    | +    | IR54        | VZLHS_28015    | +    | +    | NOS3        | VZLHS_264475   | +    | +    | ROBO1       | VZLHS_32196    | +    | +    | TP53        | VZLHS_39615    | +    | +    |
| ATP11A      | VZLHS_61340    |      |      | ERK3        | VZLHS_262029   |      |      | IR54        | VZLHS_28085    |      |      | NTNG1       | VZLHS_96052    | +    | +    | ROBO1       | VZLHS_32197    | +    | +    | TP53        | VZLHS_39613    | +    | +    |
| ATP11A      | VZLHS_61338    |      |      | ERK3        | VZLHS_134570   |      |      | ITGAE       | VZLHS_275031   |      |      | NTNG1       | VZLHS_96051    | +    | +    | RUNX1T1     | VZLHS_15002    |      |      | TP53        | TRCN0000037553 |      |      |
| ATP13A1     | VZLHS_34066    |      |      | ERK3        | VZLHS_182154   |      |      | ITGAE       | VZLHS_133454   | +    | +    | NTNG1       | VZLHS_96054    |      |      | RUNX1T1     | TRCN0000096598 |      |      | TTL3        | VZLHS_223927   |      |      |
| ATP13A1     | TRCN0000051608 |      |      | ERK3        | VZLHS_182154   |      |      | ITGAE       | VZLHS_133451   | +    | +    | NUP210      | VZLHS_176870   |      |      | SCN3B       | VZLHS_175419   |      |      | TTL3        | TRCN0000048529 |      |      |
| ATP13A1     | TRCN0000051609 | +    | +    | ERK3        | VZLHS_83784    | +    | +    | KALRN       | VZLHS_199006   |      |      | NUP210      | VZLHS_219299   |      |      | SCN3B       | VZLHS_175417   |      |      | TTL3        | TRCN0000048528 |      |      |
| ATP13A5     | VZLHS_179229   |      |      | ERK3        | VZLHS_83784    | +    | +    | KALRN       | VZLHS_263240   | +    | +    | NUP210      | VZLHS_176868   |      |      | SCN3B       | VZLHS_358981   |      |      | UHRF2       | VZLHS_149460   | +    | +    |
| ATP13A5     | VZLHS_23942    | +    | +    | ERK3        | VZLHS_83784    | +    | +    | KALRN       | VZLHS_263222   | +    | +    | OBSCN       | VZLHS_28312    |      |      | SCN3B       | VZLHS_358981   |      |      | UHRF2       | VZLHS_149462   | +    | +    |

## Supplementary Table S2. List of all screened shRNAs targeting random genes

| Clone ID     | Gene Symbols               | 1CTP | Clone ID     | Gene Symbols         | 1CTP | Clone ID     | Gene Symbols     | 1CTP | Clone ID     | Gene Symbols      | 1CTP | Clone ID         | Gene Symbols        | 1CTP |
|--------------|----------------------------|------|--------------|----------------------|------|--------------|------------------|------|--------------|-------------------|------|------------------|---------------------|------|
| V2LHS_101114 | HSF5                       | -    | V2LHS_162266 | KIAA2026             | -    | V2LHS_217322 | CODGAP           | -    | V2LHS_258949 | -                 | -    | V2LHS_66661      | MRPL23              | -    |
| V2LHS_101618 | -                          | -    | V2LHS_163209 | FBXO43               | -    | V2LHS_218229 | PLN              | -    | V2LHS_25956  | -                 | -    | V2LHS_68122      | PRELID2             | -    |
| V2LHS_101768 | -                          | -    | V2LHS_165401 | -                    | -    | V2LHS_218270 | SMPD4, FLJ41352  | -    | V2LHS_259783 | NF2               | -    | V2LHS_68738      | LOC157381           | -    |
| V2LHS_103872 | SLC35E2, RP11-345P4.4      | -    | V2LHS_165590 | -                    | -    | V2LHS_218527 | TSPAN4           | -    | V2LHS_260651 | -                 | -    | V2LHS_69357      | EOMES               | -    |
| V2LHS_104531 | -                          | -    | V2LHS_165596 | -                    | -    | V2LHS_218834 | SLC16A10         | +    | V2LHS_261232 | -                 | -    | V2LHS_69401      | -                   | -    |
| V2LHS_105645 | -                          | -    | V2LHS_16782  | FBP2                 | -    | V2LHS_219156 | OR5K4            | -    | V2LHS_262372 | ST5               | -    | V2LHS_69715      | LYG2                | -    |
| V2LHS_108415 | -                          | -    | V2LHS_168533 | -                    | -    | V2LHS_219522 | LOC130355        | -    | V2LHS_262537 | VCAM1             | -    | V2LHS_70215      | -                   | -    |
| V2LHS_109255 | -                          | -    | V2LHS_169173 | -                    | -    | V2LHS_220477 | -                | -    | V2LHS_263239 | ACYP2             | -    | V2LHS_70516      | UHRF1, LOC100133565 | -    |
| V2LHS_110154 | -                          | -    | V2LHS_169367 | -                    | -    | V2LHS_220779 | ORC1L            | +    | V2LHS_263096 | SFRS6             | +    | V2LHS_70718      | -                   | -    |
| V2LHS_110452 | -                          | -    | V2LHS_169577 | -                    | -    | V2LHS_221197 | ZNF85            | -    | V2LHS_264104 | CCDC60            | -    | V2LHS_70802      | CCDC104             | -    |
| V2LHS_110633 | -                          | -    | V2LHS_16967  | GOLGB1               | -    | V2LHS_221407 | ACTBL2           | -    | V2LHS_264773 | -                 | -    | V2LHS_71965      | B4GALNT2            | -    |
| V2LHS_110767 | -                          | -    | V2LHS_169974 | SERPIN8              | -    | V2LHS_221682 | SERPINF1         | -    | V2LHS_265855 | -                 | -    | V2LHS_72116      | -                   | -    |
| V2LHS_111327 | RP11-151A6.2               | -    | V2LHS_171239 | RAP1A                | -    | V2LHS_221966 | PINK1            | -    | V2LHS_268217 | ARF4              | -    | V2LHS_72154      | -                   | -    |
| V2LHS_111896 | ACACA                      | -    | V2LHS_171350 | TLR4                 | -    | V2LHS_222117 | WDR44            | -    | V2LHS_269008 | -                 | -    | V2LHS_72199      | -                   | -    |
| V2LHS_112050 | ALDH3A1                    | -    | V2LHS_171493 | TPM4                 | -    | V2LHS_222727 | LOC284262        | -    | V2LHS_269098 | -                 | -    | V2LHS_72249      | CAMK1G              | -    |
| V2LHS_112366 | CHRNB1                     | -    | V2LHS_17212  | -                    | -    | V2LHS_222883 | UBE2V2           | -    | V2LHS_276463 | MFS5D5            | -    | V2LHS_72587      | -                   | -    |
| V2LHS_113117 | CCR1                       | -    | V2LHS_172145 | ZNF264               | -    | V2LHS_222945 | DEPDC1           | -    | V2LHS_277826 | POLR1B            | -    | V2LHS_74033      | HDAC9               | -    |
| V2LHS_113258 | CSTF2                      | -    | V2LHS_17240  | TMOC4                | -    | V2LHS_223321 | PLS1             | -    | V2LHS_27935  | LY86              | -    | V2LHS_74041      | C2orf43             | -    |
| V2LHS_113545 | DPYSL2                     | -    | V2LHS_172493 | TAF15                | -    | V2LHS_223430 | PIGA             | -    | V2LHS_27966  | RAE1              | -    | V2LHS_74615      | ASXL1               | -    |
| V2LHS_113750 | EPAS1                      | -    | V2LHS_174041 | C21orf55             | -    | V2LHS_22475  | -                | -    | V2LHS_28203  | -                 | -    | V2LHS_75292      | LOC121906           | -    |
| V2LHS_113857 | FH1                        | -    | V2LHS_174072 | LPCAT2               | -    | V2LHS_225011 | NAP1L6           | -    | V2LHS_283279 | HSN2              | -    | V2LHS_75840      | -                   | -    |
| V2LHS_114304 | GTF2E2                     | -    | V2LHS_174609 | FLJ20712             | -    | V2LHS_225587 | RCBTB2           | -    | V2LHS_285890 | C1orf49, C1orf220 | -    | V2LHS_76027      | NF1                 | +    |
| V2LHS_116102 | MRPL51, RAB31P             | -    | V2LHS_175228 | RBSN1                | -    | V2LHS_227034 | C6orf32          | -    | V2LHS_286436 | -                 | -    | V2LHS_78198      | -                   | -    |
| V2LHS_116821 | GPR83                      | -    | V2LHS_175239 | CNO                  | -    | V2LHS_227310 | CXCL12           | -    | V2LHS_29175  | RNF183            | -    | V2LHS_80182      | DMN                 | -    |
| V2LHS_118342 | MAS1L                      | -    | V2LHS_176261 | RNF216               | -    | V2LHS_228842 | ADSS             | -    | V2LHS_29248  | C19orf40          | -    | V2LHS_81798      | -                   | -    |
| V2LHS_119091 | ELOWL7                     | -    | V2LHS_176549 | ING3                 | -    | V2LHS_229142 | LETM01           | -    | V2LHS_29339  | RPUSD2            | -    | V2LHS_82128      | -                   | -    |
| V2LHS_119132 | MORC3                      | -    | V2LHS_176630 | CLRS1                | -    | V2LHS_230644 | KRT10            | -    | V2LHS_29824  | FLJ16124          | -    | V2LHS_82529      | HK2                 | -    |
| V2LHS_120978 | LOC100130673, LOC100134684 | -    | V2LHS_177218 | C19orf48             | -    | V2LHS_230654 | NAT5             | -    | V2LHS_30865  | MXD1              | -    | V2LHS_82896      | IRX6                | -    |
| V2LHS_123189 | ZNF624                     | -    | V2LHS_179779 | MOXD1                | -    | V2LHS_23124  | -                | -    | V2LHS_31264  | -                 | -    | V2LHS_83245      | FLJ32682            | -    |
| V2LHS_123448 | -                          | -    | V2LHS_18068  | LOC149884            | -    | V2LHS_232882 | PKDZL1           | -    | V2LHS_31648  | -                 | -    | V2LHS_83376      | ANKRD57             | -    |
| V2LHS_123619 | -                          | -    | V2LHS_180778 | -                    | -    | V2LHS_235586 | HEATR5B          | -    | V2LHS_31708  | RAVER1            | -    | V2LHS_83817      | ERCC3               | -    |
| V2LHS_124058 | -                          | -    | V2LHS_181420 | PGAP1                | -    | V2LHS_235702 | LY75             | -    | V2LHS_32326  | TFP2              | -    | V2LHS_83945      | EPB42               | -    |
| V2LHS_124550 | -                          | -    | V2LHS_181966 | TMEM17               | -    | V2LHS_236794 | LOC283435        | -    | V2LHS_33383  | SLC30A8           | -    | V2LHS_83962      | -                   | -    |
| V2LHS_125451 | -                          | -    | V2LHS_182233 | -                    | -    | V2LHS_237284 | -                | -    | V2LHS_33437  | HIST1H4C          | -    | V2LHS_84218      | -                   | -    |
| V2LHS_126622 | -                          | -    | V2LHS_182438 | -                    | -    | V2LHS_237714 | SRDS4A2L2        | -    | V2LHS_33452  | -                 | -    | V2LHS_84707      | -                   | -    |
| V2LHS_128825 | -                          | -    | V2LHS_182486 | -                    | -    | V2LHS_238193 | POLR2B           | -    | V2LHS_35058  | DEFA5             | -    | V2LHS_86605      | SYPL1               | -    |
| V2LHS_129834 | -                          | -    | V2LHS_183592 | LOC284865            | -    | V2LHS_238546 | TRIM46           | -    | V2LHS_3553   | DUSP8             | -    | V2LHS_86870      | KIAA0922            | -    |
| V2LHS_132025 | GPR39                      | -    | V2LHS_184128 | ORAI2                | -    | V2LHS_238690 | VPS54            | -    | V2LHS_36444  | SLC16A7           | -    | V2LHS_88470      | CP                  | -    |
| V2LHS_133095 | HMGCB2                     | -    | V2LHS_184307 | LOC286114            | -    | V2LHS_238825 | RADS4B           | -    | V2LHS_36857  | SSPO              | -    | V2LHS_88888      | -                   | -    |
| V2LHS_134135 | LY75                       | -    | V2LHS_184442 | -                    | -    | V2LHS_239255 | NROB1            | -    | V2LHS_37991  | -                 | -    | V2LHS_89832      | PSEN1               | -    |
| V2LHS_134397 | NOP5/NOP58                 | -    | V2LHS_184523 | LOC286254            | -    | V2LHS_239291 | HNF4G            | -    | V2LHS_38134  | GRB10             | -    | V2LHS_89945      | -                   | -    |
| V2LHS_135471 | FOLR1                      | -    | V2LHS_185846 | -                    | -    | V2LHS_240019 | GTF3C5           | -    | V2LHS_40790  | -                 | -    | V2LHS_90115      | -                   | -    |
| V2LHS_135551 | SOBP                       | -    | V2LHS_18592  | DYNC1I1              | -    | V2LHS_240036 | ZFP62, LOC643836 | -    | V2LHS_40923  | -                 | -    | V2LHS_90366      | NMU                 | -    |
| V2LHS_137268 | DEPDC2                     | -    | V2LHS_186617 | -                    | -    | V2LHS_241222 | -                | -    | V2LHS_44557  | -                 | +    | V2LHS_91329      | EML5                | +    |
| V2LHS_137913 | ARPC5L                     | -    | V2LHS_18664  | TBC1D20              | -    | V2LHS_241276 | GTF2A2           | -    | V2LHS_45778  | -                 | -    | V2LHS_91553      | -                   | -    |
| V2LHS_138593 | C8orf53                    | -    | V2LHS_188068 | LOC643166            | -    | V2LHS_242130 | OR51E2           | -    | V2LHS_45803  | -                 | -    | V2LHS_91573      | -                   | -    |
| V2LHS_138639 | CHCHD6                     | -    | V2LHS_190449 | LOC344328, LOC728162 | -    | V2LHS_242428 | -                | -    | V2LHS_47453  | MBD3              | -    | V2LHS_91751      | KLHL18              | -    |
| V2LHS_138988 | PLAT                       | -    | V2LHS_19083  | LOC146325            | -    | V2LHS_242962 | GPR99, LYPD1     | -    | V2LHS_47505  | MBD4              | -    | V2LHS_92252      | FLA2G2A             | -    |
| V2LHS_139519 | EBF2                       | -    | V2LHS_191378 | -                    | -    | V2LHS_243155 | ZFP62, LOC643836 | -    | V2LHS_47557  | -                 | -    | V2LHS_93320      | COL17A1             | -    |
| V2LHS_140914 | -                          | -    | V2LHS_192413 | PRO2012              | -    | V2LHS_24350  | C10orf6          | -    | V2LHS_47605  | -                 | -    | V2LHS_93663      | DCX                 | -    |
| V2LHS_141304 | RBSN1L                     | -    | V2LHS_193674 | -                    | -    | V2LHS_243686 | -                | -    | V2LHS_49921  | NR1D2             | -    | V2LHS_94561      | AFPB1               | -    |
| V2LHS_141373 | LOC285501                  | -    | V2LHS_19417  | MAP2K7               | +    | V2LHS_244007 | RAB3GAP2         | -    | V2LHS_49989  | CCS               | -    | V2LHS_95305      | KIAA0141            | -    |
| V2LHS_142260 | -                          | -    | V2LHS_195354 | -                    | -    | V2LHS_245782 | ZNF848           | -    | V2LHS_50715  | C11orf90          | -    | V2LHS_96867      | LOC26010            | -    |
| V2LHS_144752 | RSHL3                      | -    | V2LHS_196157 | USP26                | -    | V2LHS_246137 | -                | -    | V2LHS_51042  | PMPEDA1           | -    | V2LHS_96902      | PTCD1               | -    |
| V2LHS_144815 | -                          | -    | V2LHS_196370 | LHFP                 | -    | V2LHS_246972 | UBIAD1           | -    | V2LHS_51716  | SMARCAD1          | -    | V2LHS_97427      | HDFFRP3             | -    |
| V2LHS_145056 | -                          | -    | V2LHS_196442 | WWP2                 | -    | V2LHS_247631 | -                | -    | V2LHS_51754  | C11orf60          | -    | V2LHS_97516      | E1F3E1P             | -    |
| V2LHS_145188 | LOC100131353               | -    | V2LHS_197782 | LHX6                 | -    | V2LHS_247865 | -                | -    | V2LHS_51796  | DAZAP1            | -    | V2LHS_98768      | NUDT9               | -    |
| V2LHS_145271 | -                          | -    | V2LHS_199955 | HYOU1                | -    | V2LHS_247951 | EXOD1            | -    | V2LHS_52116  | -                 | -    | V2LHS_99249      | SEH1L               | -    |
| V2LHS_146481 | -                          | -    | V2LHS_20081  | ZNF597               | -    | V2LHS_248572 | -                | -    | V2LHS_52452  | -                 | -    | V2LHS_99336      | TEX11               | -    |
| V2LHS_147158 | -                          | -    | V2LHS_202139 | STK33                | -    | V2LHS_249542 | UOHL3            | -    | V2LHS_52876  | LOC127295         | -    | Negative Control | -                   | -    |
| V2LHS_148300 | -                          | -    | V2LHS_204157 | -                    | -    | V2LHS_24967  | LOC285401        | -    | V2LHS_53720  | CNTNAP2           | -    | Negative Control | -                   | -    |
| V2LHS_150657 | CLTCL1                     | -    | V2LHS_204426 | RNF151               | -    | V2LHS_250942 | -                | -    | V2LHS_54384  | -                 | -    | Negative Control | -                   | -    |
| V2LHS_150823 | COX7A2                     | -    | V2LHS_204445 | RAD9B                | -    | V2LHS_250215 | PDK2I1P1         | -    | V2LHS_54537  | -                 | -    | Negative Control | -                   | -    |
| V2LHS_150860 | CFM                        | -    | V2LHS_20531  | MYO1B                | -    | V2LHS_251838 | -                | -    | V2LHS_55636  | -                 | -    | Negative Control | -                   | -    |
| V2LHS_152058 | MYD88                      | -    | V2LHS_20685  | LOC441086            | -    | V2LHS_25191  | GLRX             | +    | V2LHS_56193  | TP53BP1           | +    | Negative Control | -                   | -    |
| V2LHS_152085 | MYH11                      | -    | V2LHS_207008 | -                    | -    | V2LHS_251919 | C3orf43          | -    | V2LHS_56749  | -                 | -    | Negative Control | -                   | -    |
| V2LHS_152804 | SEPW1                      | -    | V2LHS_207961 | -                    | -    | V2LHS_252337 | ZMYM6            | -    | V2LHS_58426  | -                 | -    | Negative Control | -                   | -    |
| V2LHS_153498 | SFRP54, LOC650638          | -    | V2LHS_208532 | -                    | -    | V2LHS_253357 | LOC114227        | -    | V2LHS_59014  | PDE4D             | -    | Negative Control | -                   | -    |
| V2LHS_15365  | DNL3                       | -    | V2LHS_208575 | -                    | -    | V2LHS_25459  | -                | -    | V2LHS_59352  | C9orf32           | -    | Negative Control | -                   | -    |
| V2LHS_153812 | TCEB3                      | -    | V2LHS_209406 | -                    | -    | V2LHS_254594 | USP8             | -    | V2LHS_60022  | METTL7A           | -    | Negative Control | -                   | -    |
| V2LHS_154118 | ADD3                       | -    | V2LHS_21029  | HMGCB4               | -    | V2LHS_254879 | HECTD3           | -    | V2LHS_60927  | -                 | -    | Negative Control | -                   | -    |
| V2LHS_156230 | HHAT                       | -    | V2LHS_211123 | -                    | -    | V2LHS_254965 | FBXW7            | +    | V2LHS_61314  | -                 | -    | Negative Control | -                   | -    |
| V2LHS_156875 | ZOCHC6                     | -    | V2LHS_214308 | INTS1                | -    | V2LHS_255392 | ALAD             | -    | V2LHS_61719  | IDE               | -    | Negative Control | -                   | -    |
| V2LHS_157244 | BBS10                      | -    | V2LHS_214638 | GPRIN1               | -    | V2LHS_25671  | -                | -    | V2LHS_61795  | FUS               | -    | Negative Control | -                   | -    |
| V2LHS_157296 | C6orf103                   | -    | V2LHS_21650  | -                    | -    | V2LHS_257412 | LOC440131        | -    | V2LHS_62078  | DEFB4, DEFB4P     | -    | Negative Control | -                   | -    |
| V2LHS_157493 | MYH14                      | -    | V2LHS_216983 | LYRM7                | -    | V2LHS_257476 | STARO3           | -    | V2LHS_65149  | LOC60284          | -    | Negative Control | -                   | -    |
| V2LHS_158349 | C10orf81                   | -    | V2LHS_21728  | -                    | -    | V2LHS_257994 | SPIN1            | -    | V2LHS_66511  | ANGPTL7           | -    | Negative Control | -                   | -    |

+ denotes enhanced growth in soft agar (in at least 6 out of 8 replicates). Blue highlight denotes positive controls that were identified in our original screen. Green highlight denotes soft-agar enhancing random shRNAs  
Clone ID could be used to retrieve shRNA sequences from Open Biosystem's website.

**Supplementary Table S3. Categorization of candidate tumor suppressor genes**

| Common Function or Process             | Candidate tumor suppressors                                                                                                              |
|----------------------------------------|------------------------------------------------------------------------------------------------------------------------------------------|
| Apoptosis                              | CHL1, CNTN4, DSCAML1 <sup>#</sup> , MAP2, OBSCN, PRKD1, PTEN, TP53                                                                       |
| ATPases                                | ATP13A1, ATP13A5, ERCC6, MYO19*                                                                                                          |
| Cell adhesion                          | ADAMTS15, ADAMTS18, ADAMTS 20, CD248, CHL1, CNTN4, COL3A1, DSCAML1 <sup>#</sup> , F8, HAPLN1, IGSF22, ITGAE, OBSCN, PTEN, PTPRD, TCERG1L |
| Chromatin remodeling/<br>transcription | ERCC6, HIST1H1B, KRT73*, MLL3*, PRDM9, SFRS6, SMAD2*, TAF2, TCERG1L, TCF7L2, TP53, UHRF2, ZMYM4*                                         |
| Cytoskeleton remodeling                | AKAP12, DTNB <sup>#</sup> , IGSF22, LMO7, MAP1B, MAP2, MYO19*, SYNE1 <sup>#</sup>                                                        |
| ECM remodeling                         | CD248, COL3A1, ADAMTS15, ADAMTS18, ADAMTS20, F8, HAPLN1, PTPRD                                                                           |
| JNK signaling                          | MAP1B, MAP2, MAP2K7, MAPK8IP2                                                                                                            |
| Nitrous oxide signaling                | GUCY1A2*, NOS3*                                                                                                                          |
| Small GTPase regulators                | IGSF22, KALRN1, NF1, MYO19*, OBSCN, TIAM1                                                                                                |
| TGF-beta signaling                     | SMAD2*, TGFBR2                                                                                                                           |
| Ubiquitin-protein ligase               | FBXW7, UHRF2                                                                                                                             |
| Unknown                                | C15orf2, FAM161A, KIAA0182, KIAA0556, KIAA2022, PHIP, RNF219, SH3TC1                                                                     |
| Uncategorized                          | CD46 <sup>#</sup> , GALNS <sup>#</sup> , GNAS*, GRM1, IRS4, KCNQ5 <sup>#</sup> , NAV3 <sup>#</sup> , NTNG1*, SLC29A1, UQCRC2             |

This table categorize candidate tumor suppressor genes into a common function or process based on gene ontology molecular function, biological process and/or literature curation. ECM: extracellular matrix. \* enhanced soft agar growth only in p53 down-regulated cells or <sup>#</sup> only in K-ras<sup>V12</sup> expressing cells.

**Supplementary Table S4. Distribution of anchorage independent genes for each sequenced sample**

| Tumor* | All mutated genes* | CAN genes* | AI genes~ | AI gene symbols~                                                                                                    |
|--------|--------------------|------------|-----------|---------------------------------------------------------------------------------------------------------------------|
| co108  | 82                 | 15         | 4         | OBSCN, NTNG1, NOS3, IRS4<br>TP53, TGFBR2, SYNE1, SFRS6, PRKD1, MLL3, GALNS, FBXW7,                                  |
| co74   | 123                | 27         | 9         | CNTN4                                                                                                               |
| co92   | 90                 | 15         | 4         | TP53, MAP2, KRT73 HAPLN1, AKAP12                                                                                    |
| mx22   | 69                 | 14         | 5         | ZMYM4, TCERG1L, MAP1B, KIAA0182, GNAS                                                                               |
| mx27   | 86                 | 16         | 6         | TIAM1, MYO19, KALRN, IGSF22, F8, DTNB                                                                               |
| mx30   | 57                 | 9          | 3         | SMAD2, PRDM9, MAP2K7                                                                                                |
| mx32   | 76                 | 19         | 6         | UHRF2, TP53, SYNE1, NAV3, KCNQ5, FAM161A, ATP13A5, ADAMTS18                                                         |
| mx38   | 77                 | 14         | 8         | TP53, SH3TC1, RNF219, NF1, NAV3, KIAA2022, ITGAE, ERCC6<br>UQCRC2, TCF7L2, TAF2, SYNE1, PHIP, OBSCN, LMO7, GUCY1A2, |
| mx41   | 99                 | 26         | 14        | GRM1, COL3A1, CD248, ATP13A1, ADAMTS20, ADAMTS15                                                                    |
| mx42   | 81                 | 14         | 6         | TP53, PTPRD, MAPK8IP2, KIAA0556, DSCAML1, C15orf2                                                                   |
| mx43   | 102                | 18         | 5         | SYNE1, SLC29A1, PTEN, HISTH1B, CHL1                                                                                 |

\* Data from Wood et. al. ~ Data from this study. AI: Anchorage independent growth

This table lists 11 completely sequenced colon cancer samples with the number of all genes (Column 2) and *CAN*-genes (Column 3) mutated in each sample. Genes involved in anchorage independent growth that were identified through a loss of function screen in immortalized human colonic epithelial cells expressing either mutant *K-ras* or shRNA against *TP53* are listed in column 4. Approximately 37% of all *CAN*-genes in an individual tumor enhance anchorage independent growth when downregulated in these sensitized non cancer cells.

**Supplementary Table S5. Anchorage independent colony formation efficiencies**

| <b>Cell Type</b>            | <b>No. of seeded cells per well</b> | <b>Colony Formation Efficiency (%)</b> |
|-----------------------------|-------------------------------------|----------------------------------------|
| HCEC 1CT                    | 3000 - 6000                         | 4.8                                    |
| HCEC 1CT + shTP53           | 1000 - 2000                         | 14.8                                   |
| HCEC 1CT + KrasV12          | 1000 - 2000                         | 14.5                                   |
| HCEC 1CT + shTP53 + KrasV12 | 500 - 1000                          | 25.3                                   |
| HCEC 1CT + shTP53 + shPTEN  | 500 - 1000                          | 52.5                                   |
| VaCo576                     | 500 - 1000                          | 43.4                                   |
| HCT116                      | 250 - 500                           | 60.1                                   |
| DLD1                        | 250 - 500                           | 48.8                                   |
| RKO                         | 250 - 500                           | 53.2                                   |
| HCEC 2CT                    | 3000 - 6000                         | 4.6                                    |
| HCEC 2CT + shTP53           | 1000 - 2000                         | 14.4                                   |
| HCEC 2CT + KRASV12          | 1000 - 2000                         | 14.6                                   |

## Supplemental Materials and Methods

**Anchorage-independent colony formation assay.** Generated cells were seeded in soft-agar as described (1) with following modifications: cells were seeded in two different densities (adjusted depending on the cell type) in 24-well plates, each density was seeded at least in triplicates and each assay was performed at least from two different cell suspensions at different times. Colony formation efficiency was calculated by average number of colonies counted per well divided by number of seeded cells. Non-silencing shRNA expressing cells were seeded with each assay to be used as normalization control to correct for plate-to-plate variations. Data is plotted as fold change compared to non-silencing or vector only infected cells. Absolute colony formation efficiencies of the parental lines as well as some of the HCEC derivatives are shown in Supplementary Table S5. GraphPad Prism 5 (GraphPad Software, Inc.) was used to plot data and perform two tailed Student's t-tests.

**Transient transfections.** For cDNA expression experiments 2 million HCT116 cells were transfected with 1  $\mu\text{g}$  of flag.MAP2K7 or pMAX.GFP construct using Effectene as described above. Cells were collected and seeded in soft agar 24 hours after transfection, cultivated for 10 days and analysed as described above. Remaining cells were selected with 800  $\mu\text{g ml}^{-1}$  G418 to isolate clones with stable integrations. For siRNA experiments, 100nM pooled siMAP2K7 (M004016, Dharmacon) or siControl (D001206, Dharmacon) was transfected to HCT116 cells using RNAiMAX (InVitrogen) according to manufacturer's instructions. Cells were collected and seeded in soft agar 24 hours after transfection, cultivated for 10 days and analysed as described above.

**Immunofluorescence.** Cells were either seeded in monolayer or in soft-agar in chamber slides. Twenty four hours after seeding, cells were fixed and stained as previously described (1) with phospho-JNK antibody (Cell Signalling, 9251).

**Immunoblotting.** Immunoblotting studies were performed as described previously (1) with following antibodies: p53 (Biomeda), phospho-JNK (Cell Signalling, 9251), JNK1/3 (Santa Cruz, SC-474), MAP2K7 (Santa Cruz, SC-25288), MAP2 (BD, 5190021018), Cleaved PARP (Cell Signalling, 9541), b-actin (Sigma, A1978), MAPK8IP2 (Abcam, 65211), GAPDH (Cell Signalling, 2118), APC (Calbiochem, OP44), KRAS (Santa Cruz, SC-30), PTEN (Cell Signalling, 9552), Flag (Sigma, F3165), NF1 (Santa Cruz, SC-67), phospho-NF-kB (Cell Signalling, 3031).

**qRT-PCR.** qRT-PCR assays were performed as described previously(1) for the following target genes: ERICH1 (5p primer, tgagccagaaacatgctgag; 3p primer, ccgctggcagtgtagagc), PTPRU (5p primer, ggagcaagtgcgaatcca; 3p primer, gaagtgtgaccatcaagtaggag), SLC22A15 (5p primer, ttgtcttattgtaatgtttctccaga; 3p primer, gttaaaggcagcactgatggt), SLC44A4 (5p primer, cctggtattggattcttgttgc; 3p primer, ggcgagaagcaagataaac), NF1 (5p primer, tgtacctatctattcaagcaaaaa; 3p primer, agtacaacatcaagcagatctgtaate).

**Network analysis.** The comprehensive network of human genes was previously described (2). Briefly, the network was constructed by compiling protein-protein interactions in HPRD (3), Gene (4), BIND (5) and IntAct (6). Signaling interactions were compiled from Biocarta and KEGG (7) as well as through manual curation. Transcription factor-target interactions were obtained from ORegAnno (8) and TRANSFAC (9).



Functional interactions between genes were constructed based on the significance of overlap of their Gene Ontology (10). These interactions were supplemented by neighbouring interactions from the Reactome (11) and KEGG metabolic interactions. For the latter, an interaction to a pair of genes was assigned if the reactions performed by their respective enzymes shared a metabolite (e.g. Hexokinase II and glucokinase, shared metabolite: glucose phosphate).

### **Supplementary References**

1. Eskiocak U, Kim SB, Roig AI, Kitten E, Batten K, Cornelius C, et al. CDDO-Me Protects against Space Radiation-Induced Transformation of Human Colon Epithelial Cells. *Radiat Res.* 2010;174:27-36.
2. Komurov K, Padron D, Cheng T, Roth M, Rosenblatt KP, White MA. Comprehensive mapping of the human kinome to epidermal growth factor receptor signaling. *J Biol Chem.* 2010;285:21134-42.
3. Mishra GR, Suresh M, Kumaran K, Kannabiran N, Suresh S, Bala P, et al. Human protein reference database--2006 update. *Nucleic acids research.* 2006;34:D411-4.
4. Maglott D, Ostell J, Pruitt KD, Tatusova T. Entrez Gene: gene-centered information at NCBI. *Nucleic acids research.* 2007;35:D26-31.
5. Bader GD, Donaldson I, Wolting C, Ouellette BF, Pawson T, Hogue CW. BIND--The Biomolecular Interaction Network Database. *Nucleic acids research.* 2001;29:242-5.
6. Kerrien S, Alam-Faruque Y, Aranda B, Bancarz I, Bridge A, Derow C, et al. IntAct--open source resource for molecular interaction data. *Nucleic acids research.* 2007;35:D561-5.
7. Kanehisa M, Goto S. KEGG: kyoto encyclopedia of genes and genomes. *Nucleic acids research.* 2000;28:27-30.
8. Griffith OL, Montgomery SB, Bernier B, Chu B, Kasaian K, Aerts S, et al. ORegAnno: an open-access community-driven resource for regulatory annotation. *Nucleic acids research.* 2008;36:D107-13.
9. Wingender E, Chen X, Hehl R, Karas H, Liebich I, Matys V, et al. TRANSFAC: an integrated system for gene expression regulation. *Nucleic acids research.* 2000;28:316-9.

10. Ashburner M, Ball CA, Blake JA, Botstein D, Butler H, Cherry JM, et al. Gene ontology: tool for the unification of biology. The Gene Ontology Consortium. *Nature genetics*. 2000;25:25-9.
11. Joshi-Tope G, Gillespie M, Vastrik I, D'Eustachio P, Schmidt E, de Bono B, et al. Reactome: a knowledgebase of biological pathways. *Nucleic acids research*. 2005;33:D428-32.
